# Supplementary material for: Predictive value of chromosome 18q11.2‐q12.1 loss for benefit from bevacizumab in metastatic colorectal cancer: A post hoc analysis of the randomized phase III‐trial AGITG‐MAX
Source: PubMed Central journal article supplement (PMC9545440; doi:10.1002/ijc.34061), 2022-05-23
Supplement: IJC-151-1166-s002.pdf [file IJC-151-1166-s002.pdf]

**Predictive value of chromosome 18q11.2-q12.1 loss for benefit from bevacizumab in metastatic colorectal cancer; a post-hoc analysis of the randomized phase III-trial AGITG-MAX**

Erik van Dijk, Erik van Werkhoven, Rebecca Asher, Jennifer K. Mooi<sup>4</sup>, David Espinoza, Hendrik F. van Essen, Harm van Tinteren, Nicole C. T. van Grieken, Cornelis J. A. Punt, Niall C. Tebbutt, Bauke Ylstra

Supplementary Table S1 (Available separately as excel file)

Supplementary Table S2

Supplementary Table S3

Supplementary Figure S1

Supplementary Figure S2

Supplementary Figure S3

|                               |                        | <b>C<br/>(n = 80)</b> | <b>B + M<br/>(n = 176)</b> | <b>P-value</b> |
|-------------------------------|------------------------|-----------------------|----------------------------|----------------|
| Chromosome q18 loss           | Yes                    | 54 (68%)              | 127 (72%)                  | 0.46           |
| ECOG Status                   | 0                      | 44 (55%)              | 105 (60%)                  | 0.50           |
|                               | 1+                     | 36 (45%)              | 71 (40%)                   |                |
| Prior Adjuvant Therapy        | Yes                    | 16 (20%)              | 42 (24%)                   | 0.52           |
| Age category                  | ≥67                    | 46 (58%)              | 92 (52%)                   | 0.50           |
| Side of disease               | Right                  | 21 (26%)              | 50 (28%)                   | 0.94           |
|                               | Left                   | 55 (69%)              | 117 (66%)                  |                |
|                               | Unknown                | 4 (5%)                | 9 (5%)                     |                |
| Number metastases             | ≤1                     | 47 (59%)              | 103 (59%)                  | >0.95          |
|                               | >1                     | 33 (41%)              | 73 (41%)                   |                |
| Gender                        | Male                   | 49 (61%)              | 114 (65%)                  | 0.67           |
| Extent of disease at baseline |                        |                       |                            |                |
|                               | Local Involvement      | 26 (33%)              | 49 (28%)                   | 0.46           |
|                               | Lung Involvement       | 56 (70%)              | 129 (73%)                  | 0.65           |
|                               | Lymph Node Involvement | 38 (48%)              | 87 (49%)                   | 0.79           |
|                               | Lung Involvement       | 31 (39%)              | 74 (42%)                   | 0.68           |
|                               | Bone Involvement       | 3 (4%)                | 4 (2%)                     | 0.68           |
|                               | Peritoneal Involvement | 16 (20%)              | 23 (13%)                   | 0.19           |
|                               | Other Involvement      | 7 (9%)                | 21 (12%)                   | 0.52           |

**Supplementary Table S2:** *Distribution of Chromosome 18q11.2-q12.1 copy number status together with other baseline demographics across treatment arms (C) capecitabine monotherapy, (B + M) capecitabine and bevacizumab with or without mitomycin.*

| Side effect  | Status          | 18q11.2-q12.1 loss | No 18q11.2-q12.1 loss | P-value |
|--------------|-----------------|--------------------|-----------------------|---------|
| Hypertension | Hypertension    | 51                 | 38                    | 0.85    |
|              | No Hypertension | 125                | 101                   |         |
| Proteinuria  | Proteinuria     | 69                 | 59                    | 0.64    |
|              | No Proteinuria  | 107                | 80                    |         |

**Supplementary Table S3:** *Distribution of side effects for bevacizumab for patients with tumors with and without 18q11.2-q12.1 loss. P-values were calculated with a chi-squared test.*

**(A)**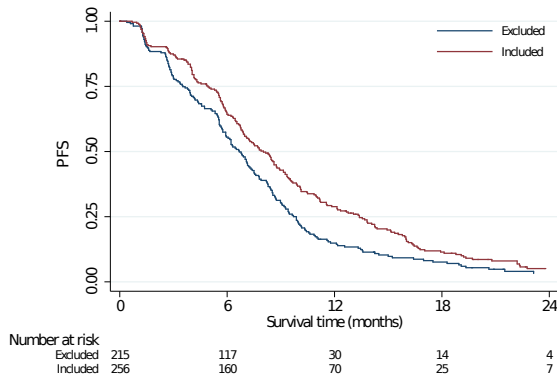**(B)**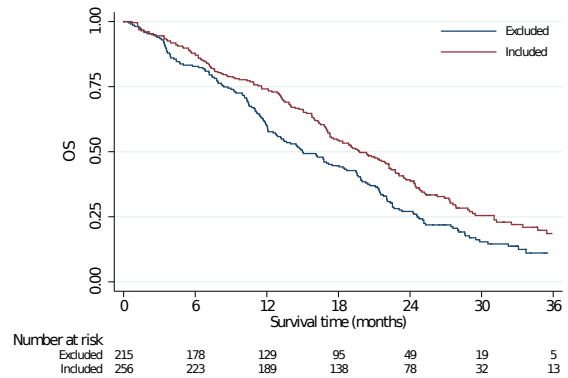**(C)**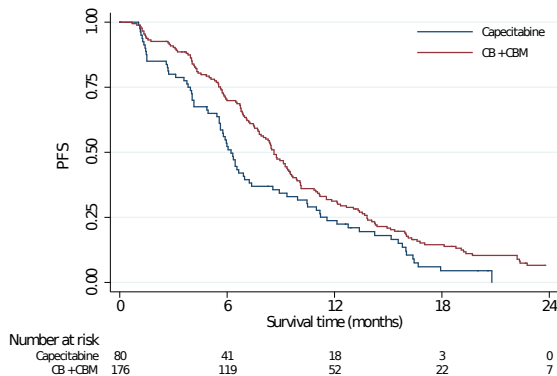**(D)**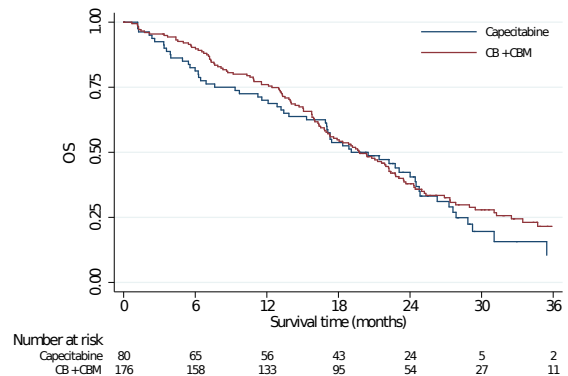

**Supplementary Figure S1. Overall survival and Progression Free Survival characteristics of AGIGT-MAX RCT cohort. Top, Kaplan-Meier analysis for (A) PFS and (B) OS of the 18q-evaluable (red) and non-evaluable (blue) cohort; Bottom, Kaplan-Meier analysis of the 18q-evaluable cohort for (C) PFS and (D) OS of patients treated with capecitabine (blue) and treated with capecitabine and bevacizumab with or without mytomycin (red). Number of patients at risk below the x-axis.**

(A)

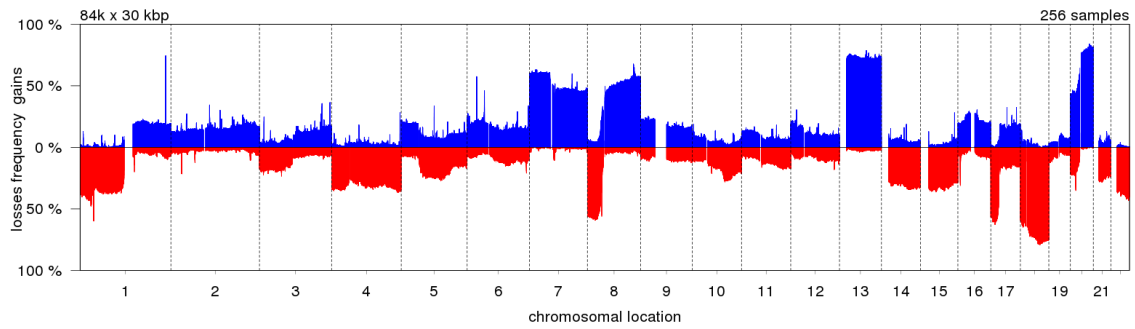

(B)

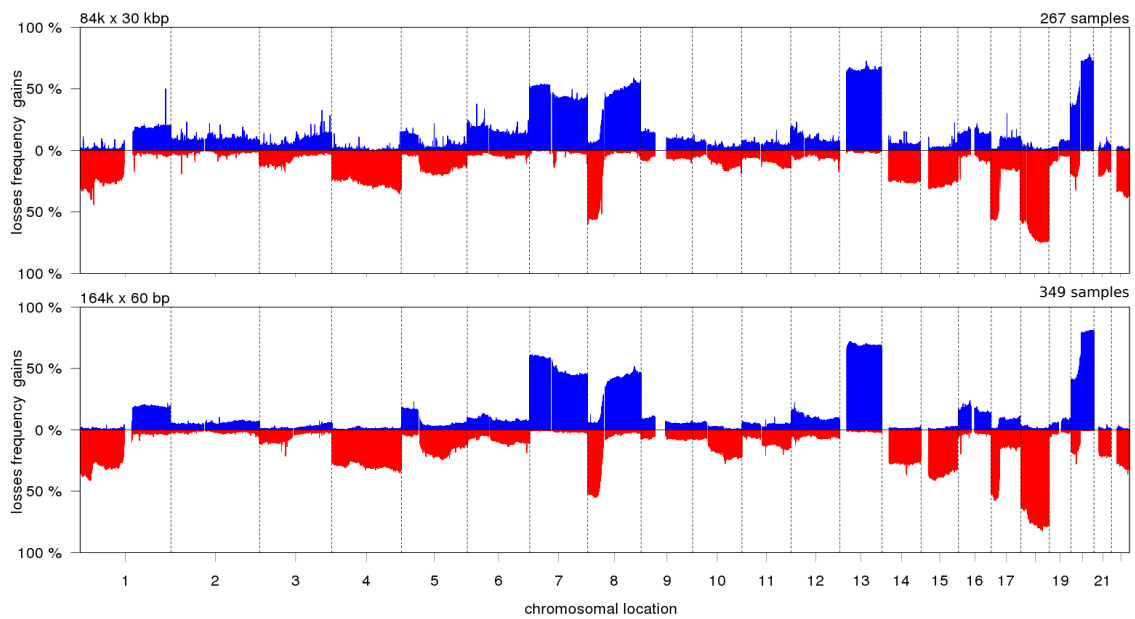

**Supplementary Figure S2. Frequencies of chromosomal copy number aberrations.** (A) Frequency plot of AGITG-MAX RCT 18q-evaluable cohort (N=256, determined by WGS); (B) Frequency plots of non-randomized cohorts (n=616) [10]; Top panel, Frequency plot of tumor samples from non-randomized cohorts determined by WGS (n=267); (Bottom panel) Frequency plot of tumor samples from non-randomized cohorts determined by arrayCGH (n=349); x-axis, chromosomal bins sorted by chromosomal position; vertical dotted lines, boundaries between chromosomes. y-axis, percentage of tumors with gains (positive values) or losses (negative values). 84k x 30 kbp is, copy number calls for 84.000 bins of 30kbp each are plotted for WGS. 164k x 60 bp is, copy number calls for 164.000 probes of 60bp each are plotted for arrayCGH

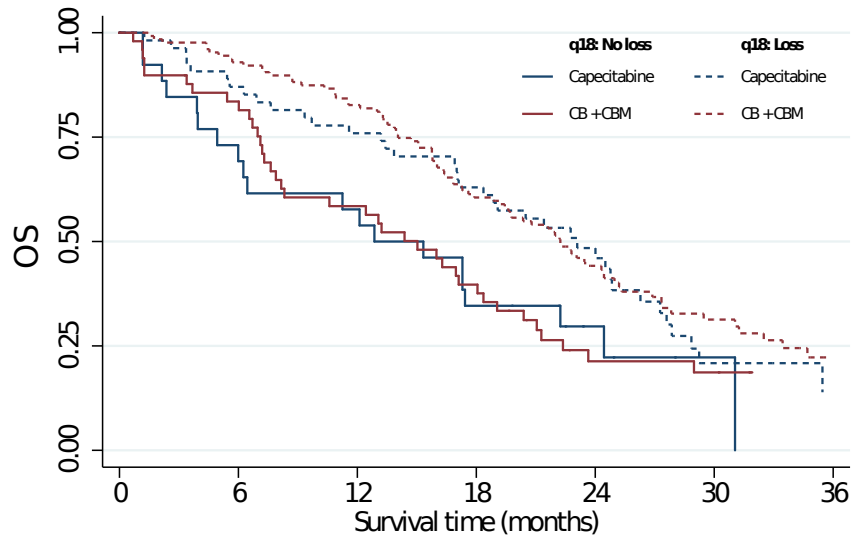

| Number at risk |              | 0   | 6   | 12  | 18 | 24 | 30 | 36 |
|----------------|--------------|-----|-----|-----|----|----|----|----|
| q18 no loss:   | Capecitabine | 26  | 18  | 15  | 9  | 4  | 1  | 0  |
|                | CB + CBM     | 49  | 40  | 28  | 19 | 8  | 7  | 4  |
| q18 loss:      | Capecitabine | 54  | 47  | 41  | 34 | 20 | 4  | 2  |
|                | CB + CBM     | 127 | 118 | 105 | 76 | 46 | 20 | 7  |

**Supplementary Figure S3. Overall Survival characteristics stratified by bevacizumab treatment and chromosome 18q11.2-q12.1 copy number status.** Kaplan-Meier analysis for the 18q-evaluable AGITG-MAX RCT cohort (N=256); Patients treated with capecitabine monotherapy (C, blue lines), with capecitabine and bevacizumab with- or without mitomycin (B + M, red lines), patients with chromosome 18q11.2-q12.1 loss tumors (dashed lines), with no-loss tumors (solid lines). Number of patients at risk below the x-axis.
